# Supplementary material for: Spatial Metabolomics Reveals Localized Impact of Influenza Virus Infection on the Lung Tissue Metabolome
Source: PubMed Central journal article supplement (PMC9426520; doi:10.1128/msystems.00353-22), 2022-06-22

Carnitine

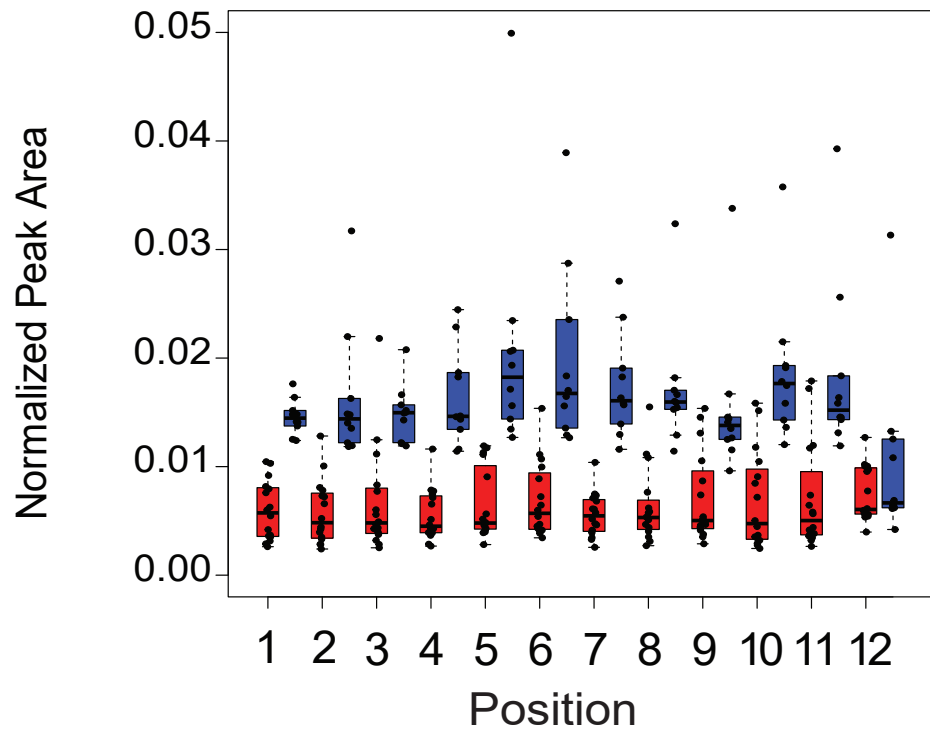

Glutamine

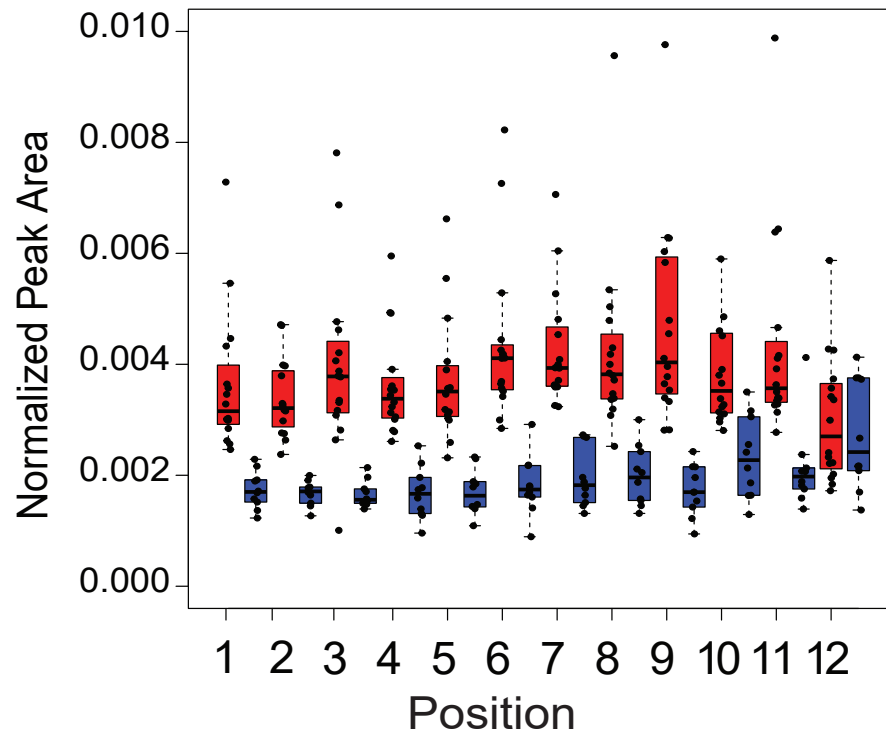

Kynurenine

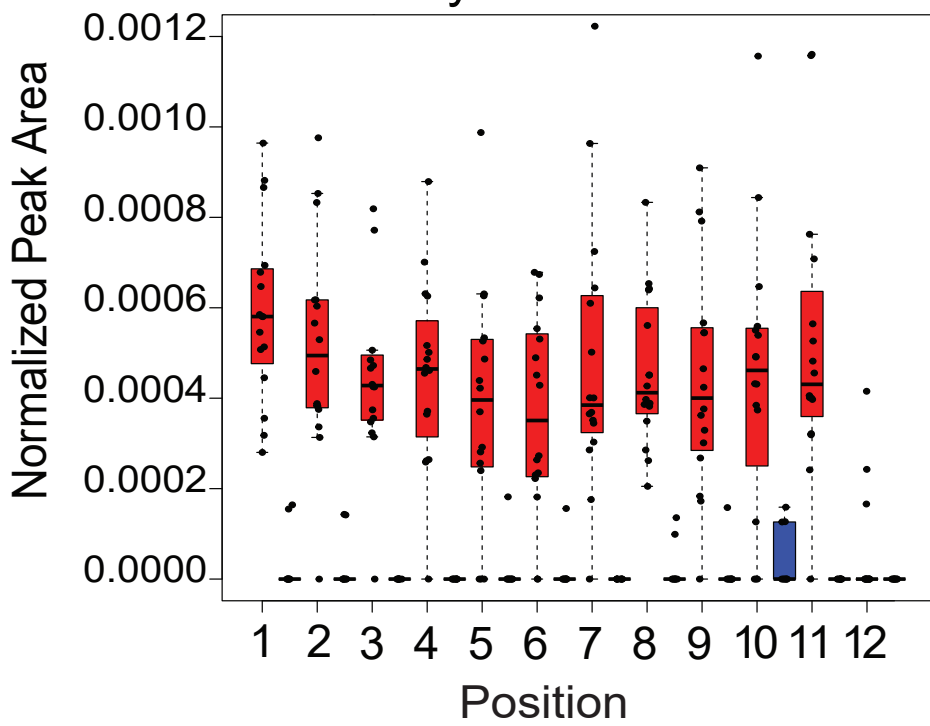

Cytosine

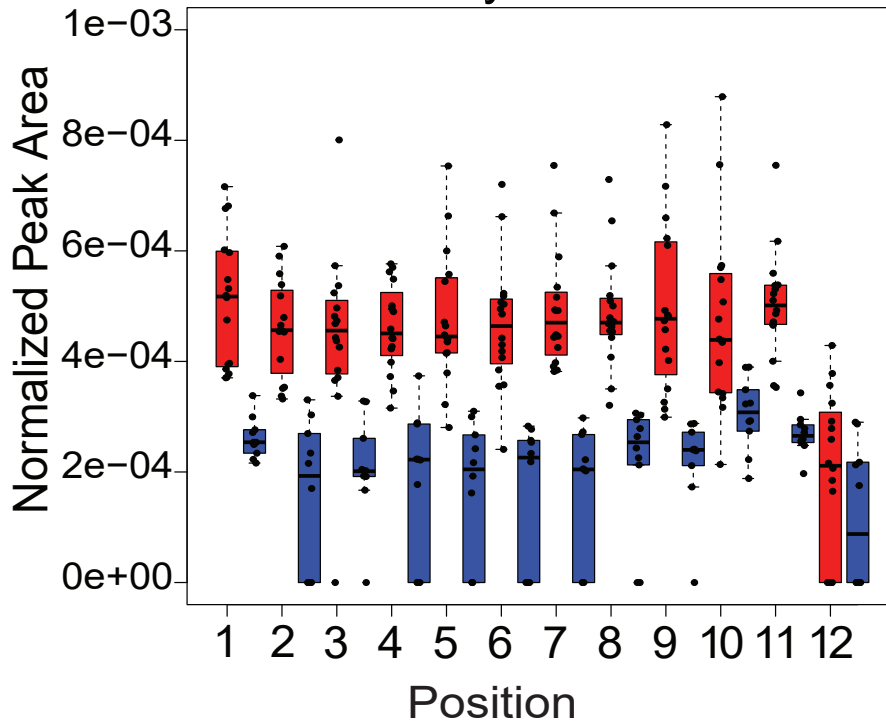

Supplement: msystems.00353-22-s0001.pdf [file msystems.00353-22-s0001.pdf]
